# Supplementary material for: Lateral diffusion of lipids in the DMPG membrane across the anomalous melting regime: effects of NaCl
Source: Royal Society of Chemistry journal article supplement (doi:10.1039/d2sm01425d), 2022-11-23
Supplement: d2sm01425d1.pdf [file d2sm01425d1.pdf]

## Supporting Information on

### Lateral Diffusion of Lipids in DMPG Membrane across the Anomalous Melting Regime: Effects of NaCl

V. K. Sharma<sup>1,2\*</sup>, J. Gupta<sup>1,2</sup>, E. Mamontov<sup>3</sup>

<sup>1</sup>*Solid State Physics Division, Bhabha Atomic Research Centre, Mumbai 400085, India*

<sup>2</sup>*Homi Bhabha National Institute, Anushaktinagar, Mumbai 400094, India*

<sup>3</sup>*Neutron Scattering Division, Oak Ridge National Laboratory, Oak Ridge, Tennessee 37830, United States*

\*Corresponding Author: Email: sharmavk@barc.gov.in; vksphy@gmail.com, Phone +91-22-25594604

#### Dynamic light scattering (DLS)

The intensity autocorrelation function,  $g^2(\tau)$ , is associated to the first order autocorrelation function of the electric field,  $g^1(\tau)$ , by the Siegert relation<sup>1</sup>,

$$g^2(\tau) = A \left[ g^1(\tau) \right]^2 + 1 \quad (\text{S1})$$

Here, A is the spatial coherence factor. For an ideal monodisperse vesicles system,  $g^1(\tau)$  function decays as a single exponential. However, for practical case, there is a polydispersity in the system, for which  $g^1(\tau)$  can be written as

$$g^1(\tau) = \int_0^\infty G(\Gamma_{\text{DLS}}) \exp(-\Gamma_{\text{DLS}}\tau) d\Gamma_{\text{DLS}}$$

where  $G(\Gamma_{\text{DLS}})$  represents the relative weight factor for relaxation rate  $\Gamma_{\text{DLS}}$ . For narrow polydispersity, the above expression can be simplified to the well-known cumulant expansion<sup>2</sup>

$$g^1(\tau) = \exp \left[ -\overline{\Gamma_{\text{DLS}}}\tau + \frac{\mu_2\tau^2}{2} \right] \quad (\text{S2})$$

where first and second cumulant,  $\overline{\Gamma_{\text{DLS}}}$  and  $\mu_2$  are the mean decay constant and variance, respectively. The ratio of the variance to the square of the mean is a measure of the polydispersity in the diffusion coefficient or hydrodynamic size and is represented by the polydispersity index (PDI).

CONTIN<sup>3</sup> analysis, which employs inversion of the Laplace integral equation providing full distribution in the size, was also used to describe the observed DLS data for DMPG vesicles in absence and presence of 100 mM NaCl. It is found to describe the data well for both the vesicles at all the measured temperatures. Intensity-weighted distributions of hydrodynamic diameter as obtained from CONTIN analysis for DMPG vesicles with no salt and DMPG vesicles in presence of 100 mM NaCl are shown in Fig. S1.

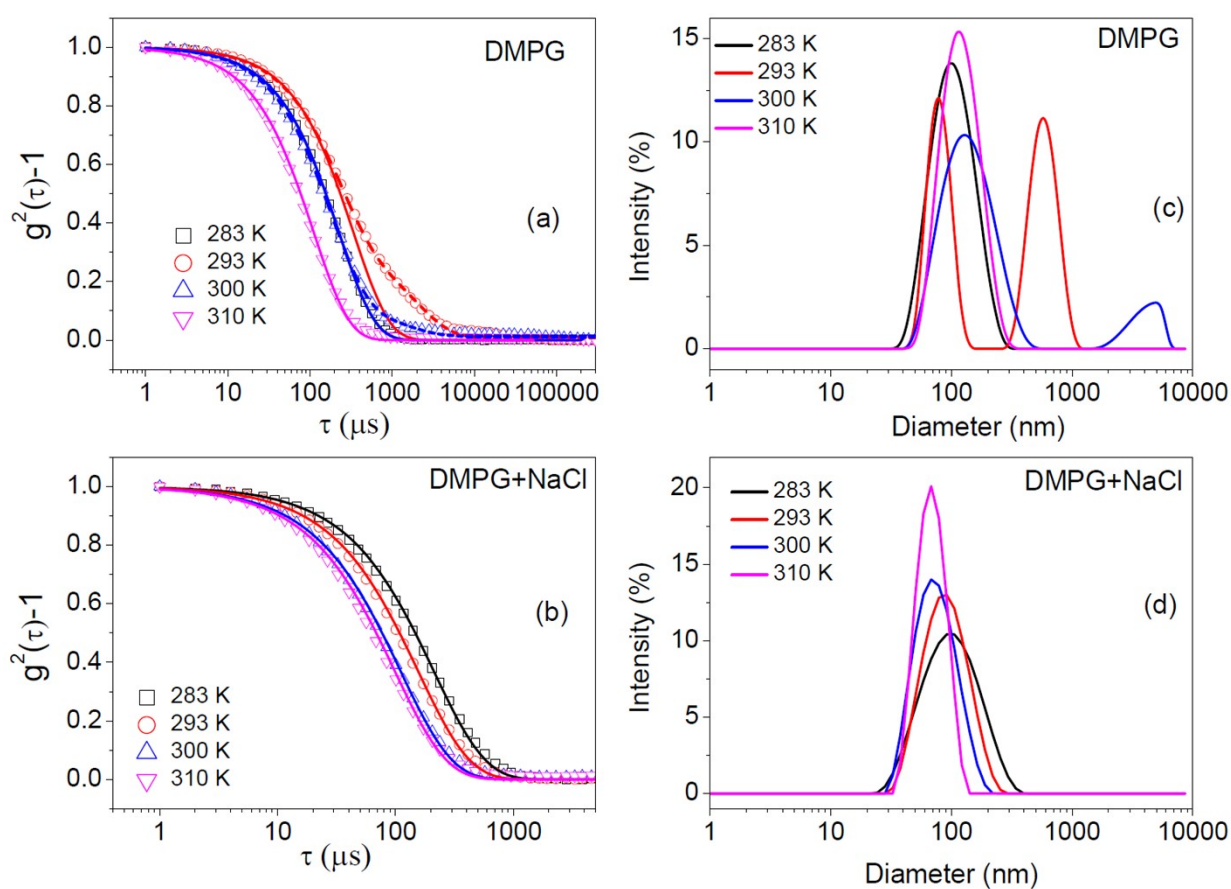

Fig. S1 Intensity autocorrelation function for (a) DMPG vesicles (b) DMPG vesicles with 100 mM NaCl at different temperatures. Solid and dashed lines are the fits as per cumulant and CONTIN analysis, respectively. It is evident that cumulant analysis could describe all the observed data except DMPG vesicles in the intermediate phase (at 293 K and 300 K), where CONTIN analysis describes data well. Size distributions of (c) DMPG vesicles (d) DMPG vesicles with 100 mM NaCl as obtained from CONTIN analysis.

### Small Angle Neutron Scattering

Small angle neutron scattering (SANS) measurements have been carried out on DMPG vesicles in D<sub>2</sub>O using the SANS diffractometer at Dhruva, BARC, India, and the observed data are shown in Fig. S2. The SANS data shows a  $Q^{-2}$  dependence in the low  $Q$  region and the absence of a Bragg peak, suggesting that the structure of the aggregates is unilamellar vesicles.

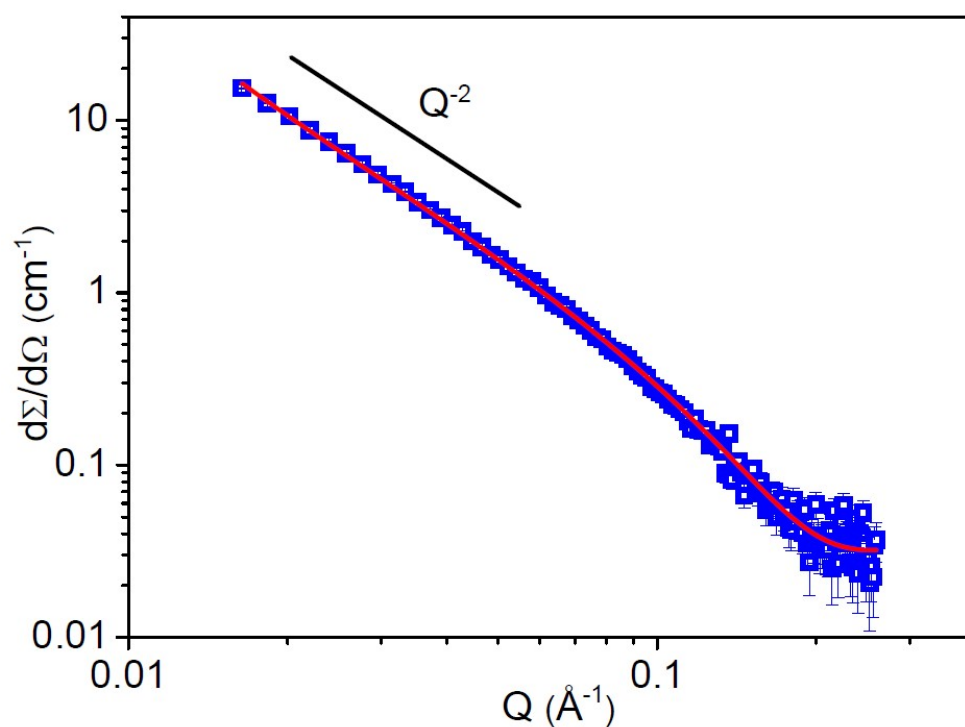

Fig. S2 SANS data for DMPG vesicles in D<sub>2</sub>O at 310 K. It is evident that at low  $Q$ , the data shows a  $Q^{-2}$  behavior and the absence of a Bragg peak.

### Elastic Scattering Intensity Scan

Elastic scattering intensity scan data were also measured on higher energy resolution HFBS spectrometer ( $\Delta E=0.8$   $\mu$ eV) on 5 (w/w) % DMPG ULVs with and without 100 mM NaCl with a cooling rate of 0.25 K/min. Measurement time at each temperature was set for 2 min per data point. Observed elastic intensity scan data is shown in Fig. S

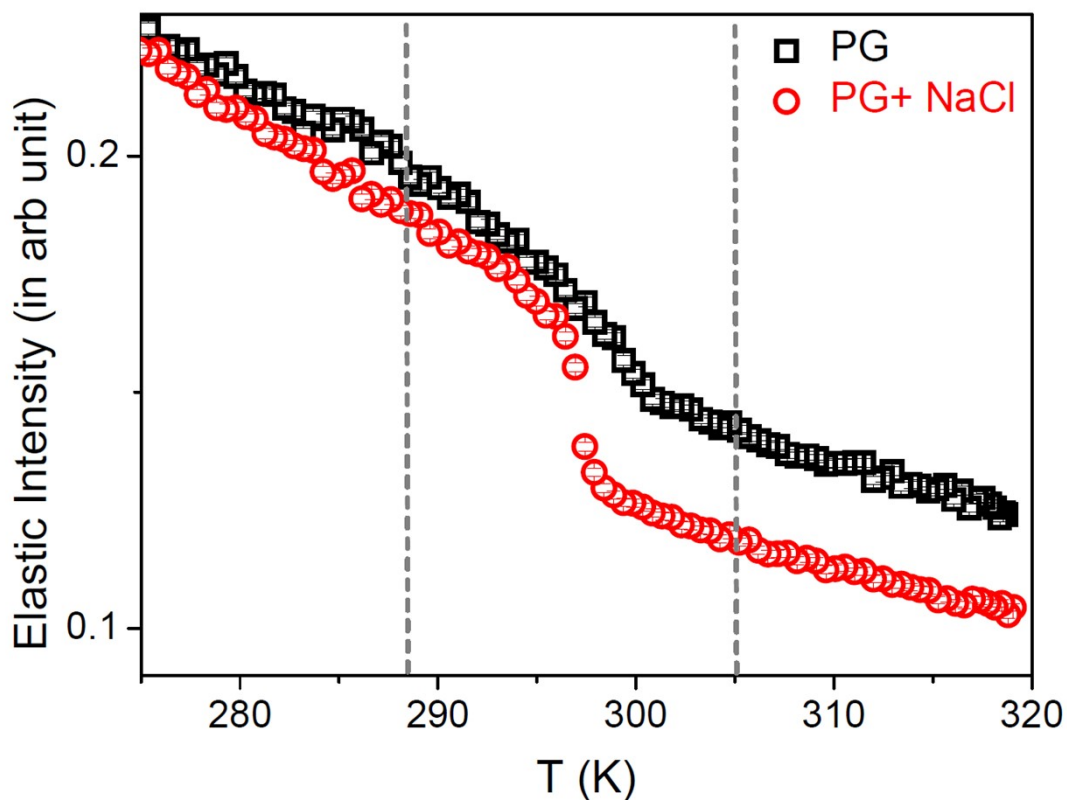

Fig. S3  $Q$ -averaged elastic scattering intensity for 5 (w/w) % DMPG unilamellar vesicles with and without 100mM NaCl as observed using higher energy resolution HFBS spectrometer ( $\Delta E=0.8 \mu\text{eV}$ ). The vertical short dashed lines represent the onset and endpoint of the phase transitions as obtained from DSC.

## References

1. Pecora, R., *Dynamic Light Scattering: Applications of Photon Correlation Spectroscopy*. Springer US: 2013.
2. Koppel, D. E., Analysis of Macromolecular Polydispersity in Intensity Correlation Spectroscopy: The Method of Cumulants. *The Journal of Chemical Physics* **1972**, 57 (11), 4814-4820.
3. Provencher, S. W., CONTIN: A general purpose constrained regularization program for inverting noisy linear algebraic and integral equations. *Comput. Phys. Commun.* **1982**, 27, 229.
